# Supplementary material for: Chemical Composition of Macroalgae Polysaccharides from Galician and Portugal Coasts: Seasonal Variations and Biological Properties
Source: MDPI journal article supplement (doi:10.3390/md21110589), 2023-11-10
Supplement: s1 [file s1]

## Supplementary Information

### 1. Results and Discussion

#### 1.1 Calibration curve for size exclusion chromatography

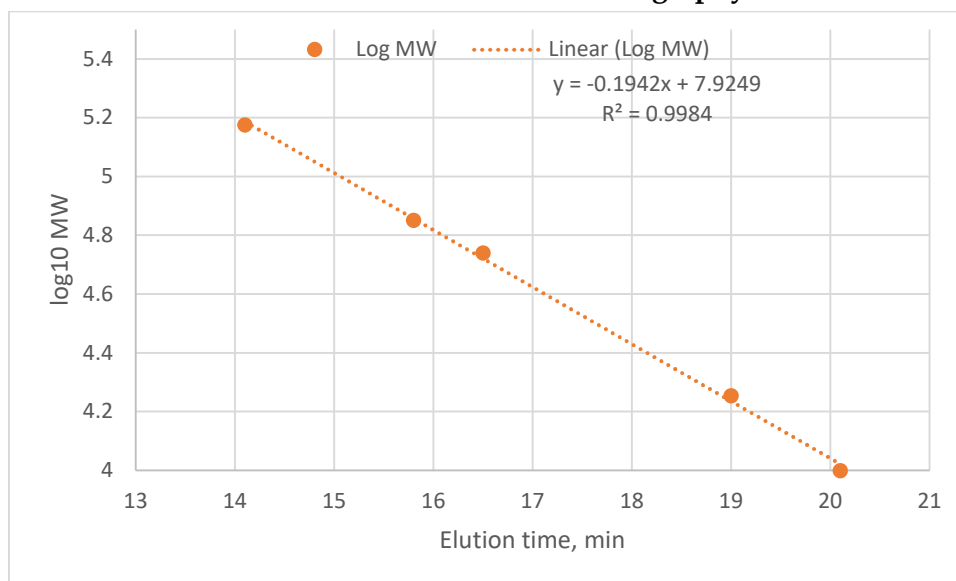

**Figure S1.** Size exclusion chromatography calibration line, using dextran standards and water as eluent.

#### 1.2 UV-Vis spectroscopy

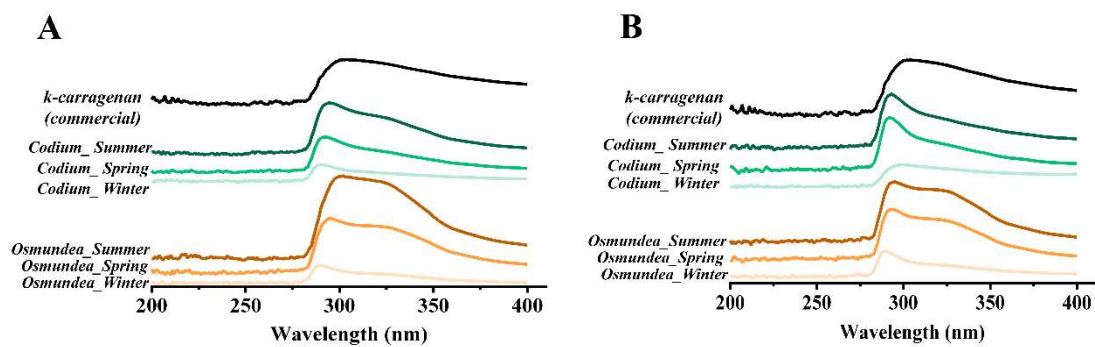

**Figure S2.** UV-Vis spectrum of polysaccharides from macroalgal species collected at different seasons from Portugal (A) and Galicia (B) coast.

### 1.3 Molecular weight of polysaccharides

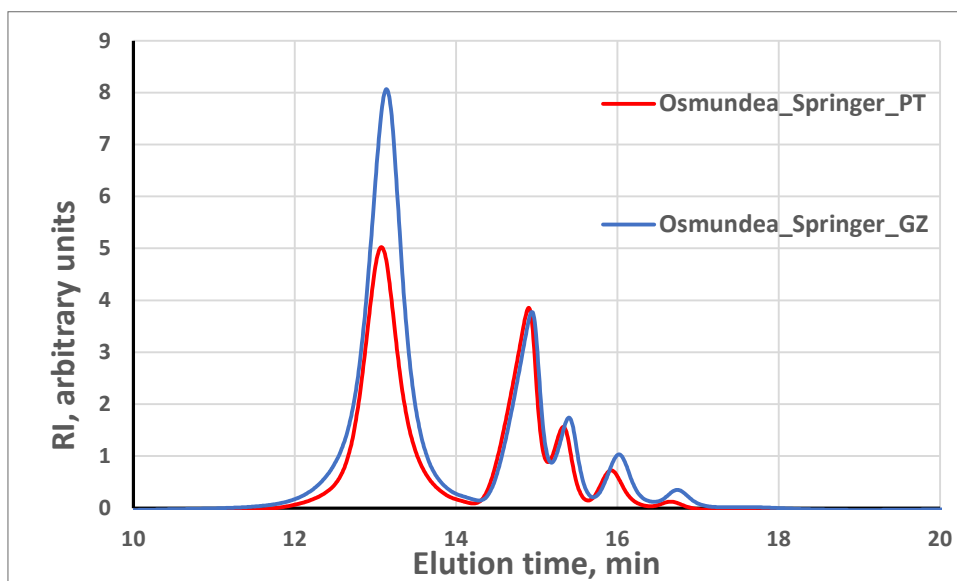

**Figure S3.** Molecular weight distribution of *Osmundea* sp. from Galicia and Portugal coasts, in spring.

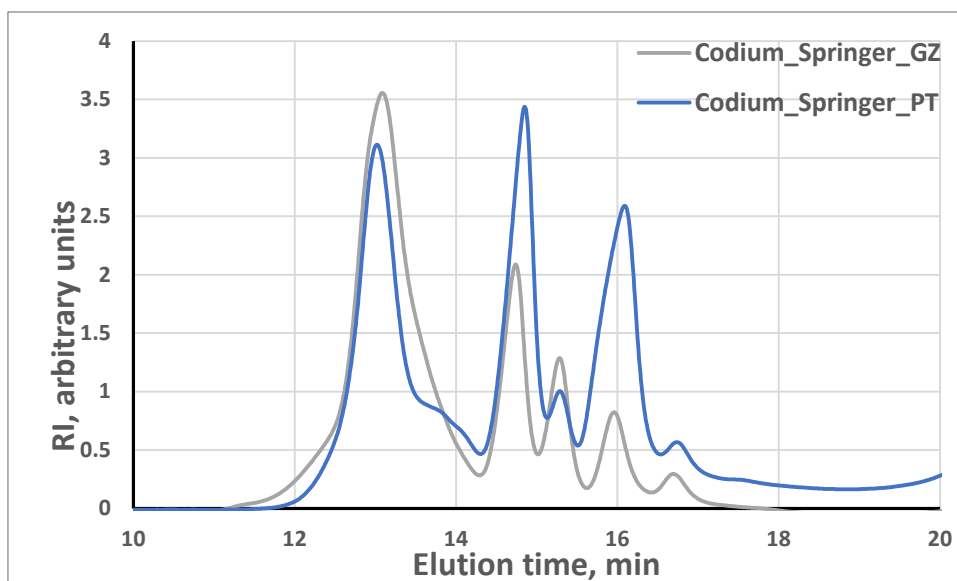

**Figure S4.** Molecular weight distribution of *Codium* sp. from Galicia and Portugal coasts, in spring.
